# Supplementary material for: Preoperative Serum Calcitonin and Its Correlation with Extent of Lymph Node Metastasis in Medullary Thyroid Carcinoma
Source: PubMed Central journal article supplement (PMC7601718; doi:10.3390/cancers12102894), 2020-10-09
Supplement: cancers-12-02894-s001.pdf [file cancers-12-02894-s001.pdf]

## Supplementary Materials

# Preoperative Serum Calcitonin and Its Correlation with Extent of Lymph Node Metastasis in Medullary Thyroid Carcinoma

Hyunju Park, Jun Park, Min Sun Choi, Jinyoung Kim, Hosu Kim, Jung Hee Shin, Jung-Han Kim, Jee Soo Kim, Sun Wook Kim, Jae Hoon Chung and Tae Hyuk Kim

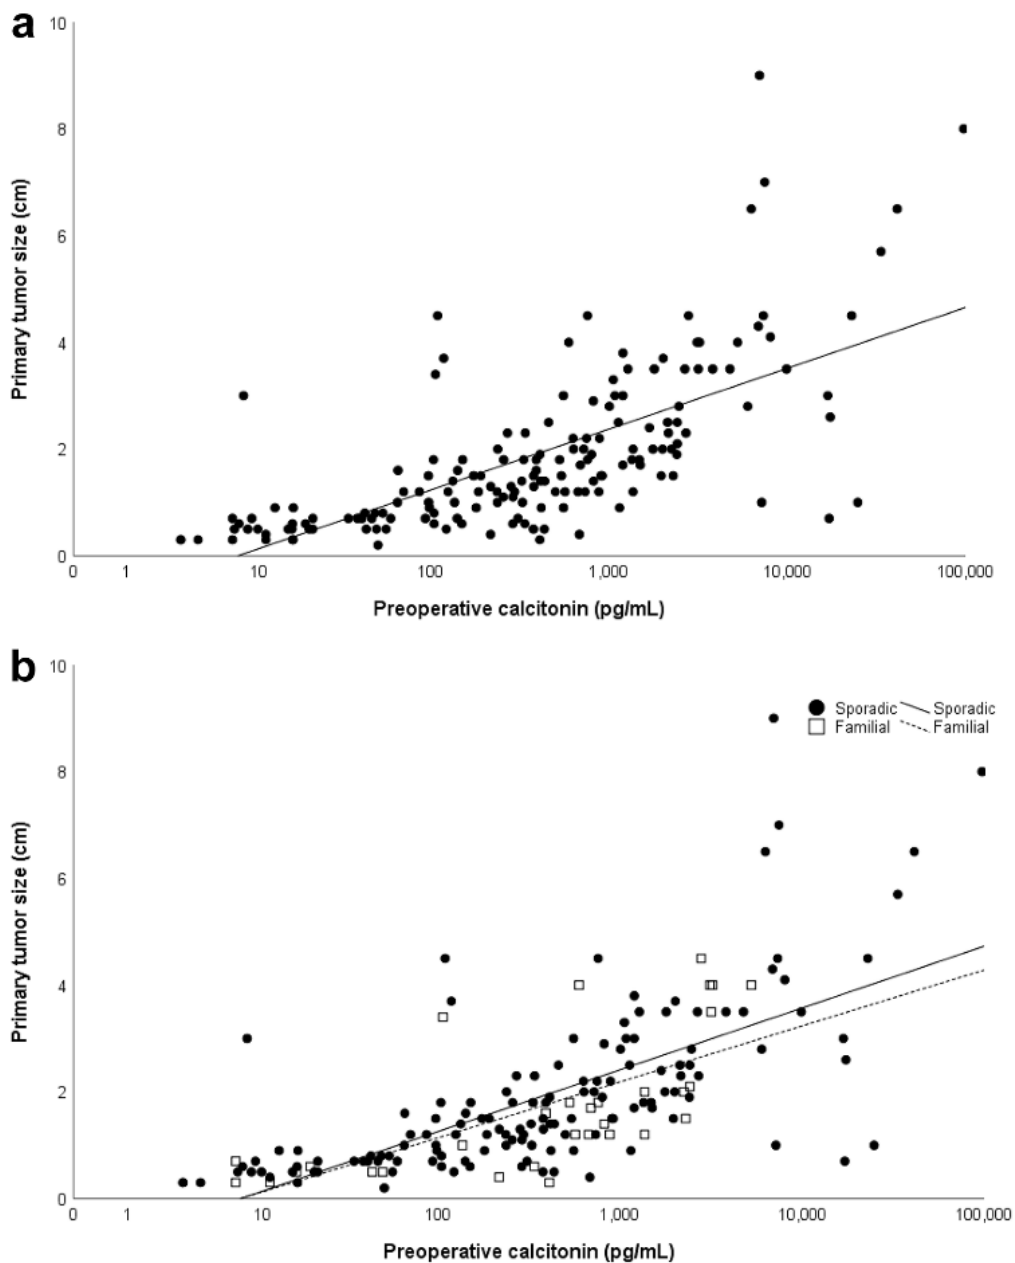

**Figure S1.** Correlation between log-transformed preoperative calcitonin level and primary tumour size. (A) All patients regardless of tumour type ( $R^2 = 0.746$  and  $p < 0.001$ ). (B) Patients divided into sporadic and hereditary medullary carcinoma groups ( $R^2 = 0.464$  and  $p < 0.01$  for sporadic medullary thyroid carcinoma;  $R^2 = 0.444$  and  $p < 0.001$  for hereditary medullary thyroid carcinoma).

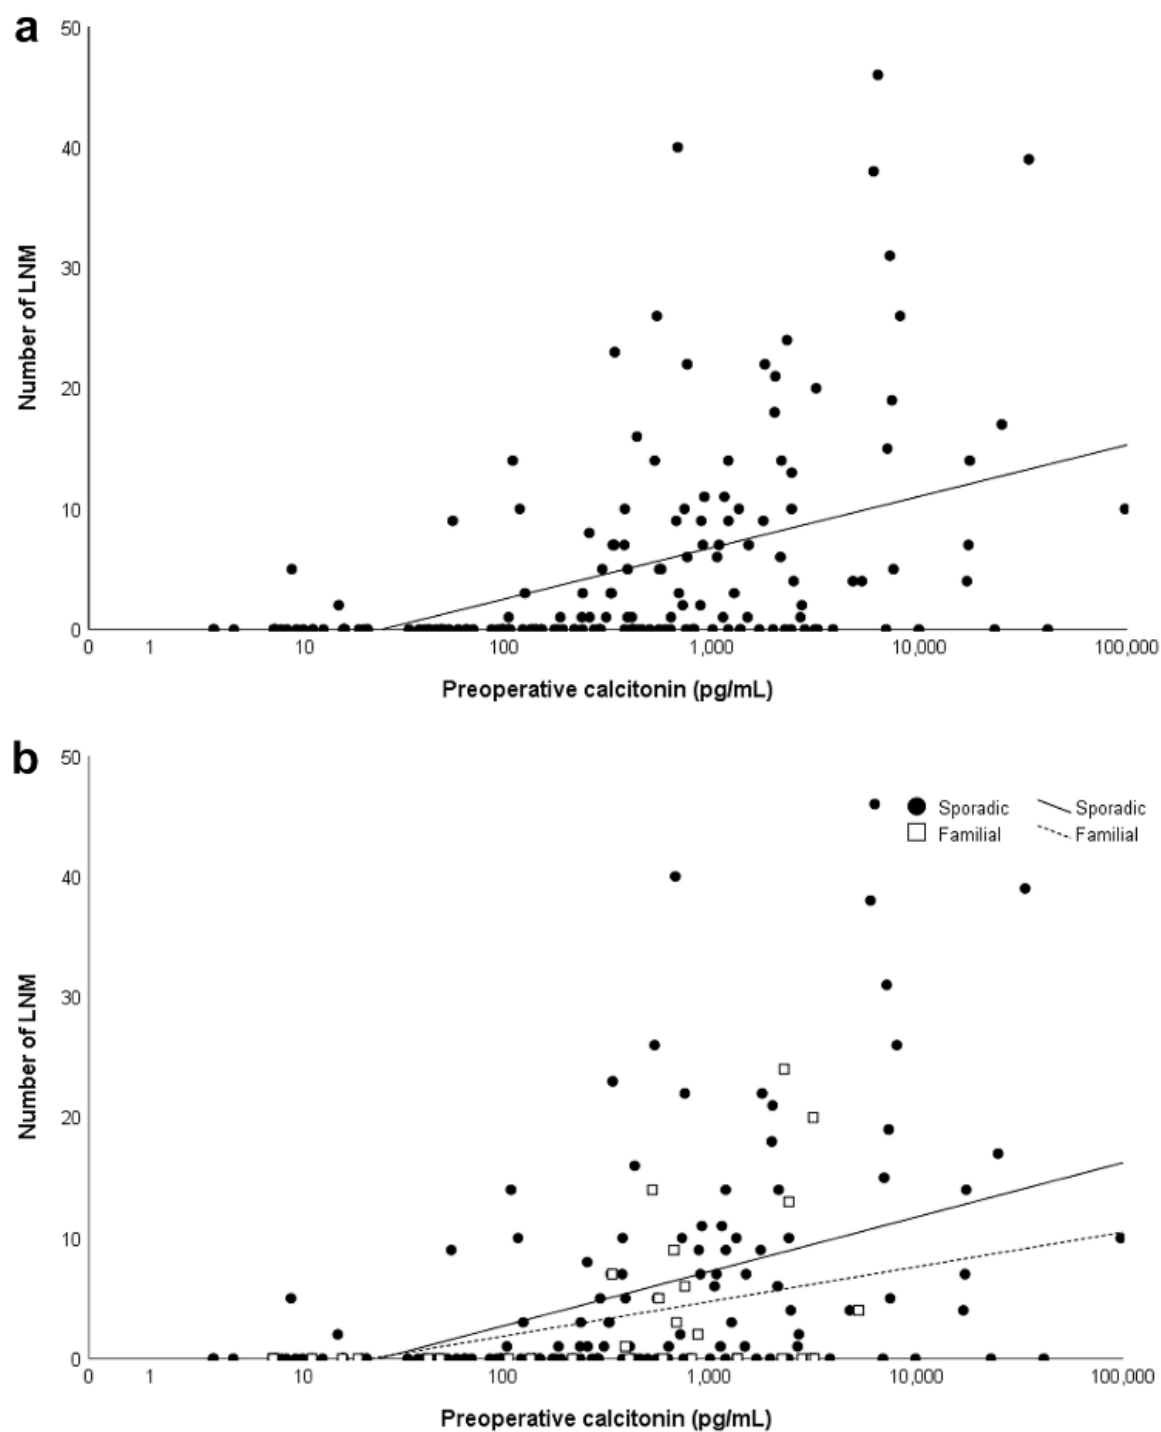

**Figure S2.** Correlation between preoperative log-calcitonin and the number of LNMs. (A) All patients regardless of tumour type ( $R^2 = 0.201$  and  $p < 0.001$ ). (B) Patients divided into sporadic and hereditary medullary carcinoma groups ( $R^2 = 0.212$  and  $p < 0.01$  for sporadic medullary thyroid carcinoma;  $R^2 = 0.148$  and  $p = 0.032$  for hereditary medullary thyroid carcinoma).

**Table S1.** Clinical course and pre- and post-operative calcitonin and images in 11 patients who did not undergo central lymph node dissection.

| No | Preop Calcitonin (pg/mL) | Primary tumor size (cm) | Multi-focality | Postop Calcitonin (pg/mL) | Preop US | Preop CT | Postop US or CT | Clinical Course             |
|----|--------------------------|-------------------------|----------------|---------------------------|----------|----------|-----------------|-----------------------------|
| 1  | 3                        | 0.3                     | No             | -                         | No LNM   | -        | -               | Loss of follow-up           |
| 2  | 16                       | 0.3                     | No             | 8                         | No LNM   | No LNM   | No LNM          | No recurrence               |
| 3  | 46                       | 0.7                     | No             | 8                         | No LNM   | -        | No LNM          | No recurrence               |
| 4  | 50                       | 0.2                     | No             | 2                         | No LNM   | -        | No LNM          | No recurrence               |
| 5  | 86                       | 1.2                     | No             | 7                         | No LNM   | No LNM   | No LNM          | No recurrence               |
| 6  | 98                       | 0.9                     | No             | 72                        | No LNM   | -        | No LNM          | Recurrence in operative bed |
| 7  | 106                      | 3.4                     | No             | 40                        | No LNM   | -        | No LNM          | No recurrence               |
| 8  | 217                      | 0.4                     | Yes            | 3                         | No LNM   | -        | No LNM          | No recurrence               |
| 9  | 597                      | 4.0                     | No             | 1                         | No LNM   | No LNM   | No LNM          | No recurrence               |
| 10 | 1370                     | 1.2                     | Yes            | 2                         | -        | No LNM   | No LNM          | No recurrence               |
| 11 | 2251                     | 2.0                     | No             | 4                         | No LNM   | No LNM   | No LNM          | No recurrence               |

No = Number; Preop = pre-operative; Postop = post-operative; US = thyroid ultrasound; CT = computer tomography; LNM = lymph node metastasis.

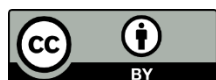

© 2020 by the authors. Licensee MDPI, Basel, Switzerland. This article is an open access article distributed under the terms and conditions of the Creative Commons Attribution (CC BY) license (<http://creativecommons.org/licenses/by/4.0/>).
